# Supplementary material
Source: publisher site journal article supplement (https://www.dovepress.com/article/436222)
Supplement: Supplementary file 1 [file get_supplementary_file.php]

Appendix 1: Search Strategy

**PubMed (includes Medline), search conducted 15 June 2021**

| **#** | **Query** | **Results** |
| --- | --- | --- |
| #1 | ("vulvodynia"[Mesh] OR vulvodynia[tw] OR "vulvar pain"[tw] OR "vulvar vestibulitis"[Mesh] OR "vulvar vestibulitis"[tw] OR vestibulodynia[tw]) | 1,319 |
| #2 | #1 AND ("2010"[Date - Publication] : "3000"[Date - Publication]) | 737 |

**Embase via embase.com, search conducted 15 June 2021**

| **#** | **Query** | **Results** |
| --- | --- | --- |
| #1 | ('vulvodynia'/de OR vulvodynia:ti,ab OR 'vulvar pain':ti,ab OR 'vulvar vestibulitis'/de OR 'vulvar vestibulitis':ti,ab OR vestibulodynia:ti,ab) | 2,582 |
| #2 | #1 AND [2010-2021]/py | 1,669 |

**CINAHL Plus via EBSCOhost, search conducted 15 June 2021**

| **#** | **Query** | **Results** |
| --- | --- | --- |
| S1 | (MH "Vulvodynia" OR TI vulvodynia OR AB vulvodynia OR TI "vulvar pain" OR AB "vulvar pain" OR MH "Vulvar Vestibulitis" OR TI "vulvar vestibulitis" OR AB "vulvar vestibulitis" OR TI vestibulodynia OR AB vestibulodynia) | 656 |
| S2 | S1 AND Limiters - Published Date: 20100101-20211231 | 407 |

**APA PsycInfo via EBSCOhost, search conducted 15 June 2021**

| **#** | **Query** | **Results** |
| --- | --- | --- |
| S1 | (TI vulvodynia OR AB vulvodynia OR TI "vulvar pain" OR AB "vulvar pain" OR TI "vulvar vestibulitis" OR AB "vulvar vestibulitis" OR TI vestibulodynia OR AB vestibulodynia) | 352 |
| S2 | (S1 AND Limiters - Published Date: 20100101-20211231 | 221 |

**CENTRAL via Cochrane Library, search conducted 15 June 2021**

| **#** | **Query** | **Results** |
| --- | --- | --- |
| S1 | [mh "vulvodynia"] OR vulvodynia OR "vulvar pain" OR [mh "vulvar vestibulitis"] OR "vulvar vestibulitis" OR vestibulodynia | 218 |
| S2 | S1 AND Custom Year 2010-present | 170 |

**Proquest Dissertations and Theses Global via Proquest, search conducted 15 June 2021**

| **#** | **Query** | **Results** |
| --- | --- | --- |
| S1 | ti(vulvodynia OR "vulvar pain" OR "vulvar vestibulitis" OR vestibulodynia) OR ab(vulvodynia OR "vulvar pain" OR "vulvar vestibulitis" OR vestibulodynia) | 53 |
| S2 | S1 AND Limiters – Publication Year: 2010-2021 | 23 |

**Theses & Dissertations**

*All searches conducted for date range 2010 – 7 June 2021.*

**OpenGrey** - <http://www.opengrey.eu/>

Search: Various terms. Ex. vulvodynia, “vulvar pain”, “vulvar vestibulitis”, vestibulodynia, vestibulectomy

**NDLTD Global ETD Search-** <http://search.ndltd.org/>

Search: vulvodynia OR "vulvar pain" OR "vulvar vestibulitis" OR vestibulodynia OR vestibulectomy

**Google Scholar Thesis/Dissertation Search** - <https://scholar.google.ca/>

Search: vulvodynia OR "vulvar pain" OR "vulvar vestibulitis" OR vestibulodynia OR vestibulectomy site:.ca OR site:.uk OR site:.edu OR site:.au OR site:.nz OR site:.eu

| **Inclusion Criteria** | **Exclusion Criteria** |
| --- | --- |
| Populations -Humans -LPV -Vulvar pain -Vestibulodynia | Populations -Non-human studies -PGAD -Chronic pelvic pain -Vaginal pain -Vaginismus -Dyspareunia -Generalized vulvodynia with no specific analyses of LPV |
| Study Type -Peer-reviewed journal articles -Dissertations -Editorials -Commentaries -Grey literature -Systematic reviews -Meta-analyses | Study Type -Etiological studies -Methodology studies -Novel diagnostic tool studies -Protocols -Papers not relating to effectiveness or efficacy of a therapy |
| Publication between 1/2010 and 3/30/2023 | Publication outside of designated timeframe |
| English or French language | Other language |
| Interventions -Pharmaceutical therapy -Physiotherapy -Psychological therapy -Alternative therapies -Complementary therapies |  |

Appendix 2: Inclusion and Exclusion Criteria
